# Supplementary material for: Trust-based Decision-making for the Adaptation of Public Displays in Changing Social Contexts
Source: Springer Nature journal article supplement (doi:10.1186/2196-064x-1-6), 2014-01-01

Imagine that you are watching your private social network on a large public display. The public area is empty.

When the stranger appears ...  
Your social network is masked.

When the stranger appears ...  
Your social network is blurred. Your mobile phone vibrates asking you to choose an action: remove, mask, or leave friends on the display.

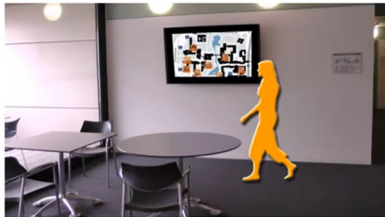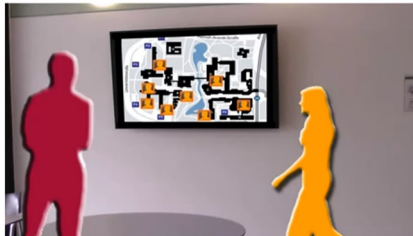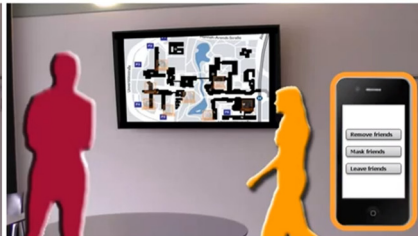

Supplement: 40493_2013_5_MOESM5_ESM.pdf [file 40493_2013_5_MOESM5_ESM.pdf]
